# Supplementary material for: Two potential self-activated orthoborates Cd4NdO(BO3)3 and Ca3Nd3(BO3)5: growth, crystal structures and optical properties
Source: Royal Society of Chemistry journal article supplement (doi:10.1039/c5nj02710a), 2015-12-16
Supplement: c5nj02710a1.pdf [file c5nj02710a1.pdf]

Title: **Two potential self-activated orthoborates  $\text{Cd}_4\text{NdO}(\text{BO}_3)_3$  and  $\text{Ca}_3\text{Nd}_3(\text{BO}_3)_5$ : Growth, crystal structures and optical properties**

Journal: *New Journal of Chemistry*

Author: Xing Wang<sup>a,b</sup>, Mingjun Xia<sup>a</sup> and R. K. Li<sup>a\*</sup>

Affiliation:

a Beijing Center for Crystal Research and Development, Key Laboratory of Functional Crystals and Laser Technology, Technical Institute of Physics and Chemistry, Chinese Academy of Sciences, Beijing 100190, P. R. China.

b University of Chinese Academy of Sciences, Beijing 100049, P. R. China

Corresponding author: R. K. Li; rkli@mail.ipc.ac.cn

Tel: 86–10–82543711

### Supporting information

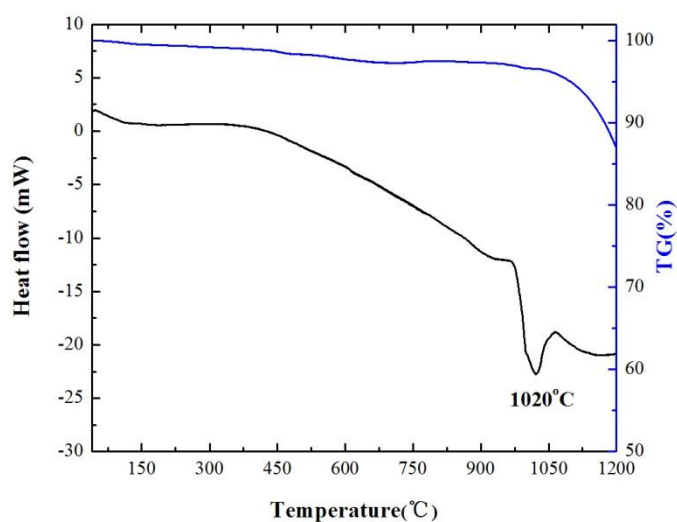

**Figure S1.** The DSC-TG curves for  $\text{Cd}_4\text{NdO}(\text{BO}_3)_3$ .

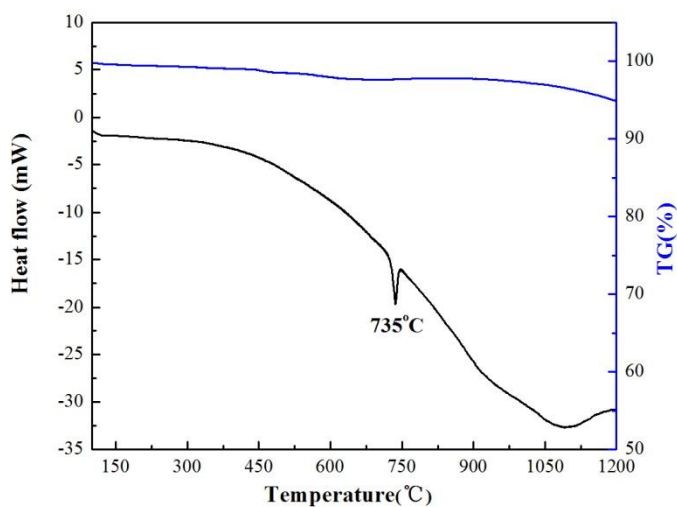

**Figure S2.** The DSC-TG curves for  $\text{Ca}_3\text{Nd}_3(\text{BO}_3)_5$ .
